# Supplementary material for: Solution-Processed PEDOT:PSS/MoS2 Nanocomposites as Efficient Hole-Transporting Layers for Organic Solar Cells
Source: PubMed Central journal article supplement (PMC6781061; doi:10.3390/nano9091328), 2019-09-16
Supplement: nanomaterials-09-01328-s001.pdf [file nanomaterials-09-01328-s001.pdf]

## Electronic Supporting Information

### Solution-Processed PEDOT:PSS/MoS<sub>2</sub> Nanocomposites as Efficient Hole-Transporting Layers for Organic Solar Cells

Madheshwaran Sekkarapatti Ramasamy<sup>a</sup>, Ka Yeon Ryu<sup>a</sup>, Ju Won Lim<sup>a</sup>, Asia Bibi<sup>a</sup>, Hannah Kwon<sup>a</sup>, Ji-Eun Lee<sup>a</sup>, Dong Ha Kim<sup>a\*</sup> and Kyungkon Kim<sup>a\*</sup>

<sup>a</sup>Department of Chemistry and Nanoscience, Ewha Womans University, 52 Ewhayeodae-gil, Seodaemun-gu, Seoul 03760, Republic of Korea

\* Corresponding author.

E-mail address: [kimkk@ewha.ac.kr](mailto:kimkk@ewha.ac.kr) (Kyungkon Kim), [dhkim@ewha.ac.kr](mailto:dhkim@ewha.ac.kr) (Dong Ha Kim).

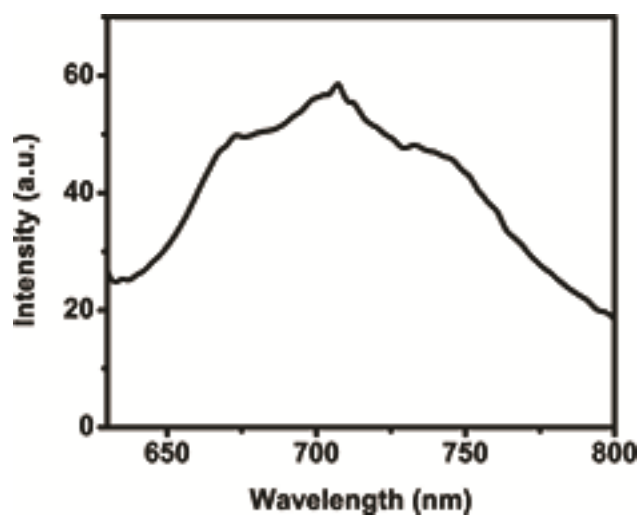

**Fig. S1.** Photoluminescence (PL) spectra of oleylamine-functionalized MoS<sub>2</sub> (FMoS<sub>2</sub>).

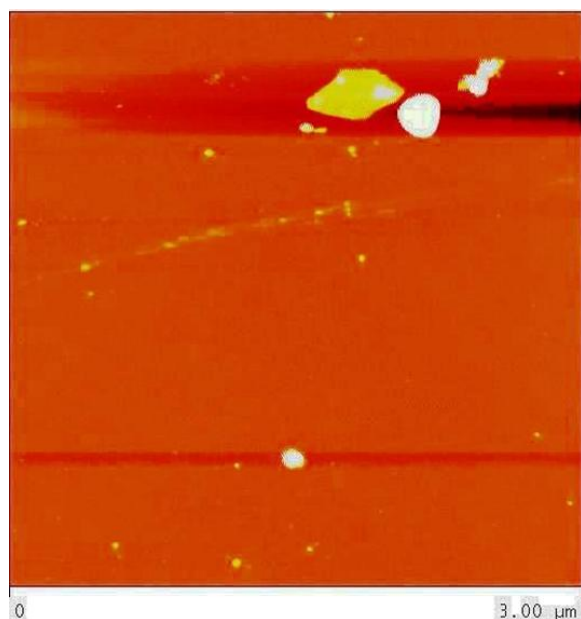

**Fig. S2.** AFM image of oleylamine-functionalized MoS<sub>2</sub> (FMOs<sub>2</sub>).

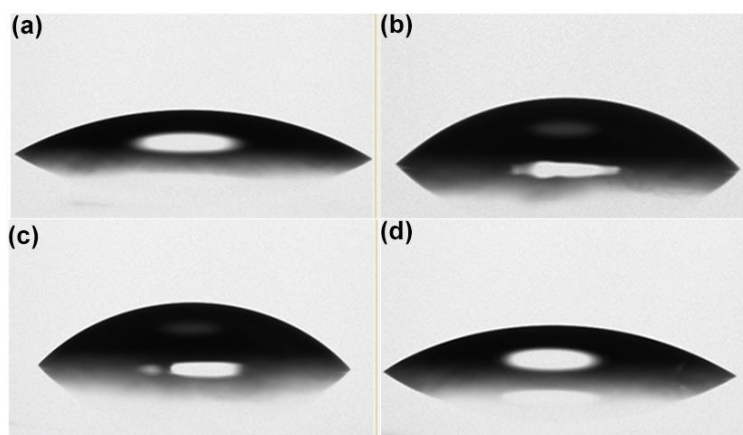

**Fig. S3.** Contact angles of (a) poly(3,4-ethylenedioxythiophene):poly(styrenesulfonate) (PEDOT:PSS) and PEDOT:PSS combined with (b) 5, (c) 20, and (d) 50 μl of oleylamine-functionalized MoS<sub>2</sub> thin films spin coated on ITO substrates.

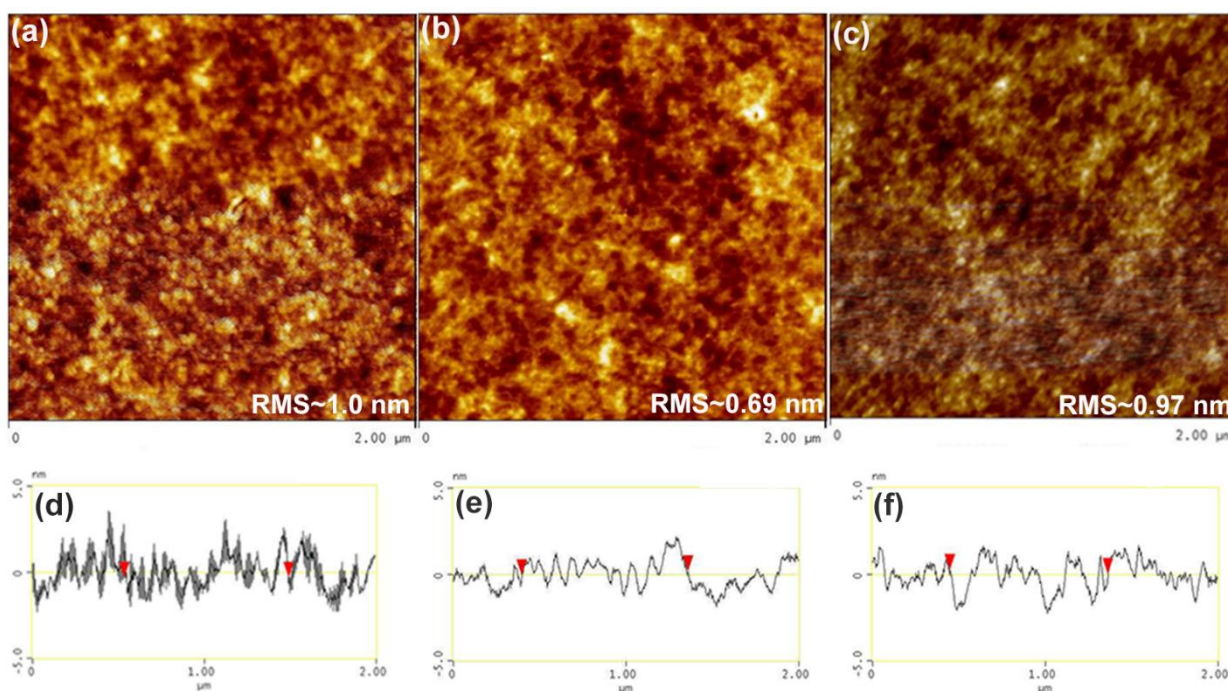

**Fig. S4.** AFM images of (a) poly(3,4-ethylenedioxythiophene):poly(styrenesulfonate) (PEDOT:PSS) and PEDOT:PSS combined with (b) 5, and (c) 50  $\mu\text{l}$  of oleylamine-functionalized  $\text{MoS}_2$ .

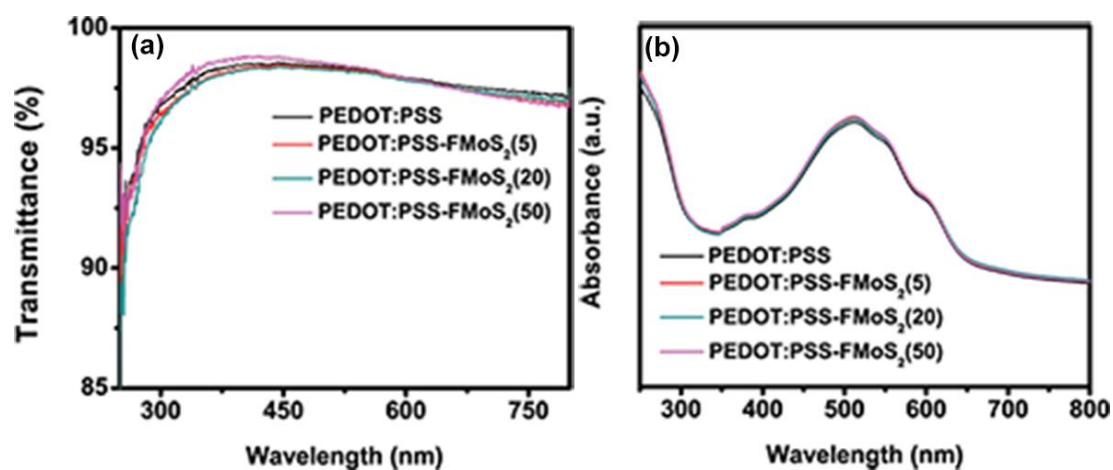

**Fig. S5.** (a) UV-Vis transmittance spectra of PEDOT:PSS and PEDOT:PSS combined with 5, 20, and 50  $\mu\text{l}$  of oleylamine-functionalized  $\text{MoS}_2$ . (b) UV-Vis absorbance spectra of P3HT:PCBM thin film spin-coated on PEDOT:PSS and PEDOT:PSS combined with 5, 20, and 50  $\mu\text{l}$  of oleylamine-functionalized  $\text{MoS}_2$ .
